# Supplementary material
Source: Royal Society of Chemistry journal article supplement (doi:10.1039/d5se01600b)
Supplement: d5se01600b1.pdf [file d5se01600b1.pdf]

## **Thermocatalytic Decarboxylation and Aromatization of Oleic Acid to Aromatics Using Mo/HZSM-5**

Satyam Dixit<sup>1</sup>, Anil Kumar Jhavar<sup>2</sup>, Birendra Adhikari<sup>2</sup>, Marcus Trygstad<sup>2</sup>, Craig Piacek<sup>2</sup> and Paul A. Charpentier<sup>1\*</sup>

<sup>1</sup>Department of Chemical and Biochemical Engineering, University of Western Ontario, 3333 Claudette MacKay-Lassonde Pavilion, London, Ontario N6A 5B9, Canada

<sup>2</sup>Department of Research & Development, Aduro Clean Technologies Inc., 542 Newbold Street, London, ON, N6E 2S5, Canada

\*For correspondence: Tel: +1-519-661-2111 Ext 83466, e-mail: [pcharpen@uwo.ca](mailto:pcharpen@uwo.ca)

Supporting Information

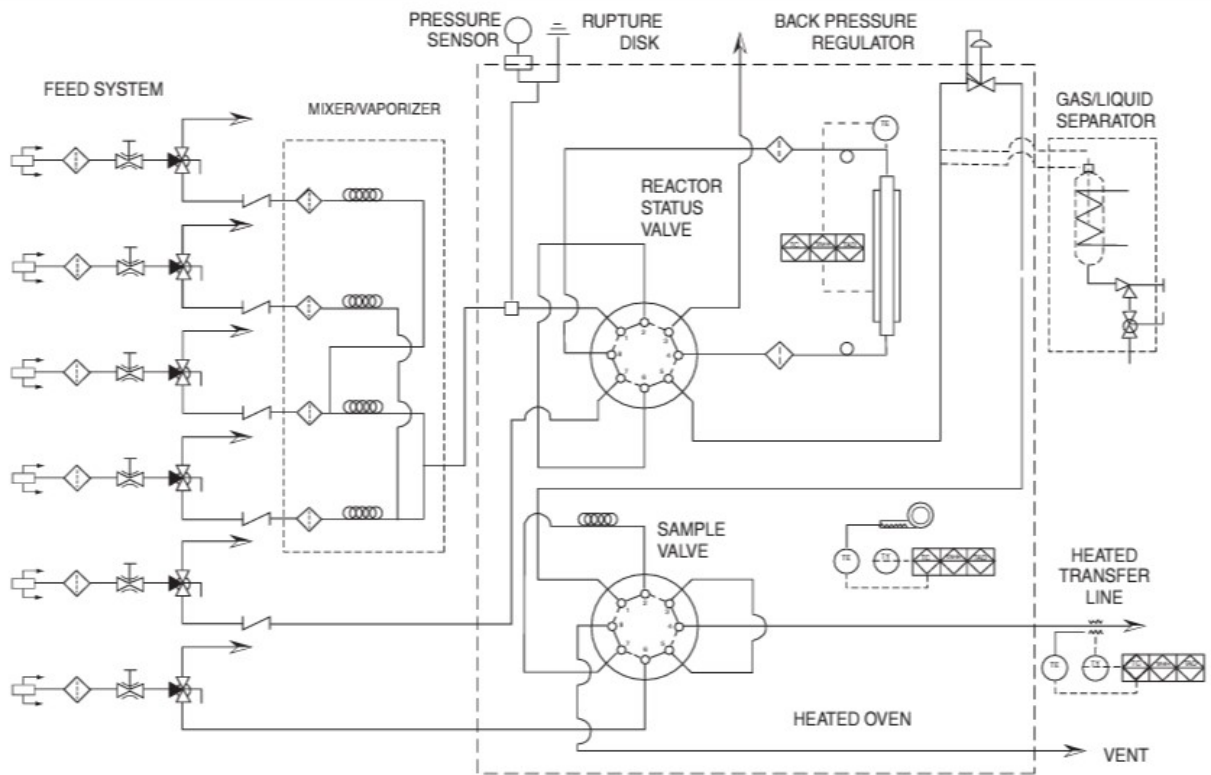

**Figure S1** Schematic of the continuous Bench-top Reactor System. (Autoclave Engineers LLC)

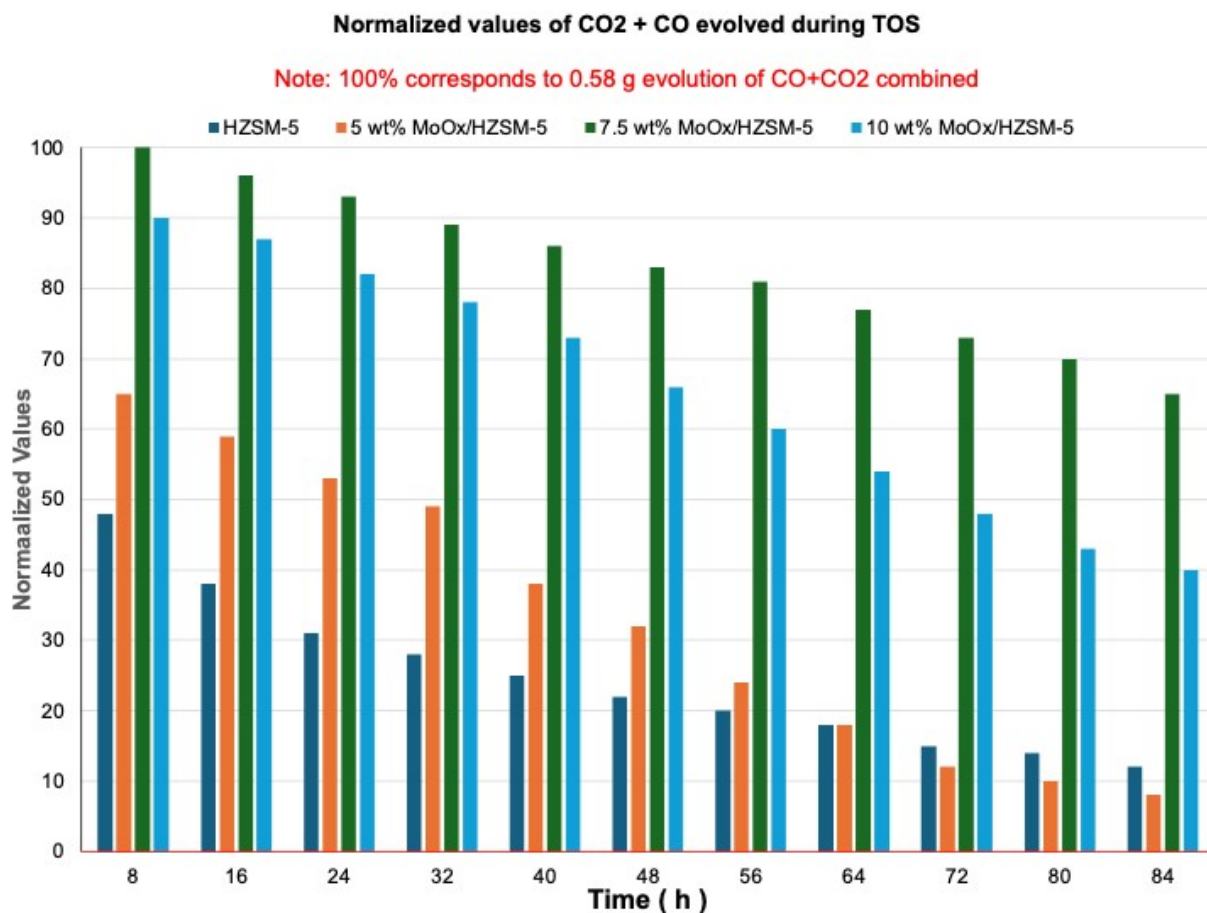

**Figure S2** Normalized values of concentrations of CO and CO<sub>2</sub> detected by GC-FID as a function of time. A normalized value of 100 refers to near-complete decarboxylation (~99%) of oleic acid, as obtained with 7.5 wt% MoO<sub>x</sub>/HZSM-5.

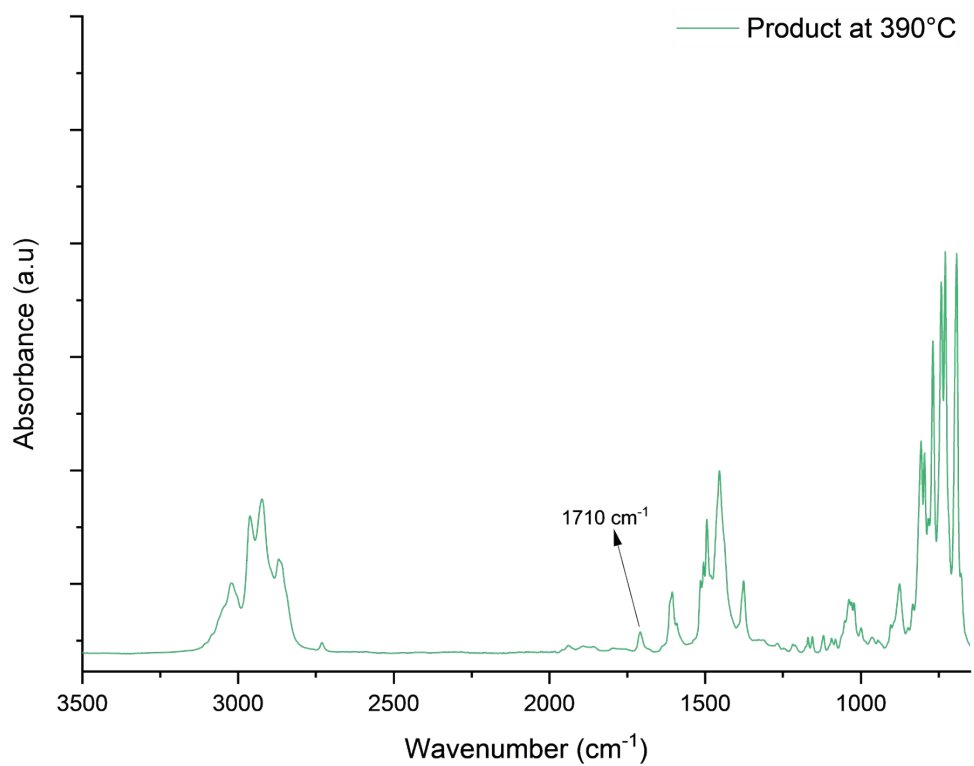

**Figure S3** IR spectra of liquid product obtained at  $T = 390\text{ }^{\circ}\text{C}$ , 7.5 wt%  $\text{MoO}_x/\text{HZSM-5}$ ,  $\tau = 4\text{h}$ , water: feed = 4:1.

---

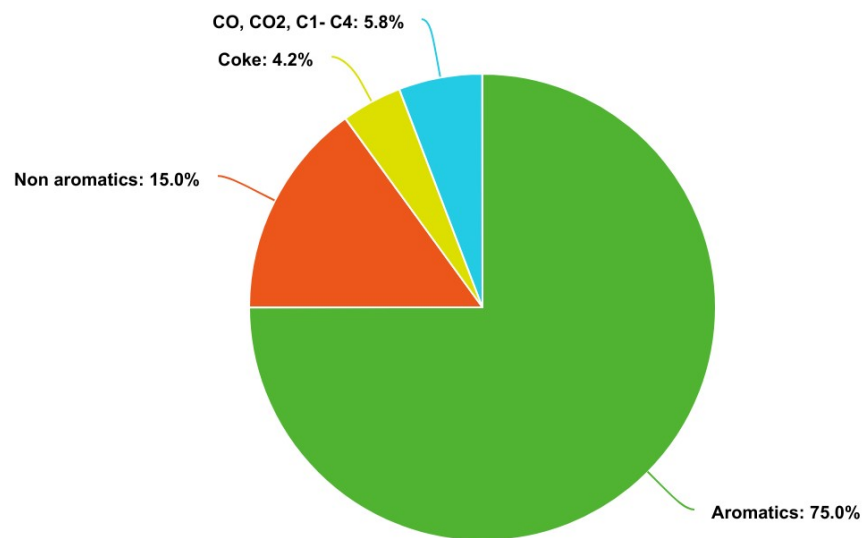

**Figure S4** Product distribution for conversion of oleic acid over 7.5 wt% MoO<sub>x</sub>/HZSM-5.

---

*Oleic Acid*;  $^1\text{H NMR}$ :  $\delta$  0.86 (3H, t,  $J = 7.0$  Hz), 1.17-1.34 (14H, 1.23 (quint,  $J = 7.0$  Hz), 1.23 (quint,  $J = 7.0$  Hz), 1.24 (quint,  $J = 7.0$  Hz), 1.24 (quint,  $J = 7.0$  Hz), 1.25 (tt,  $J = 7.7, 7.0$  Hz), 1.28 (h,  $J = 7.0$  Hz), 1.28 (quint,  $J = 7.0$  Hz)), 1.35-1.62 (6H, 1.42 (tt,  $J = 7.4, 7.0$  Hz), 1.43 (tt,  $J = 7.4, 7.0$  Hz), 1.55 (tt,  $J = 7.7, 7.4$  Hz)), 1.90-2.02 (4H, 1.96 (q,  $J = 7.4$  Hz), 1.97 (q,  $J = 7.4$  Hz)), 2.30 (2H, t,  $J = 7.4$  Hz), 5.30-5.45 (2H, 5.37 (dt,  $J = 15.6, 7.4$  Hz), 5.37 (dt,  $J = 15.6, 7.4$  Hz)).

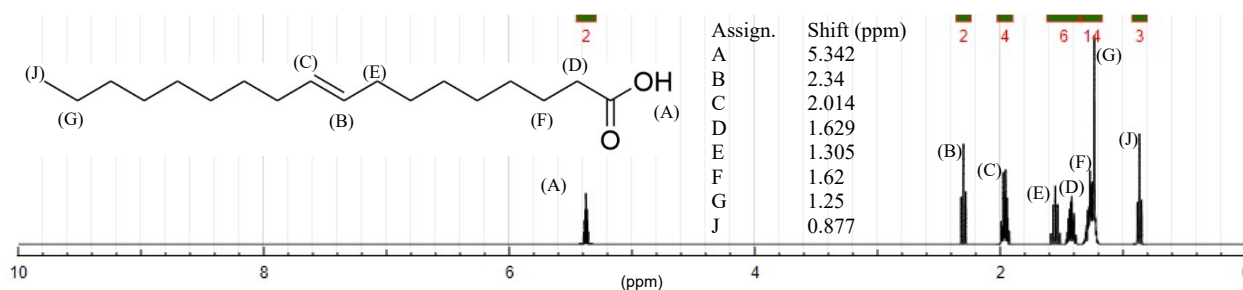

**Figure S5** NMR Spectra for a model compound; Different types of protons can be seen in different ppm regions.

**Figure S6** Relative ratios of integral area for different chemical shifts and interpretation.

| Sample                                                   | Integral Ratio                               |                                            |                                                        |                                                                                              | Interpretation                                                                         |
|----------------------------------------------------------|----------------------------------------------|--------------------------------------------|--------------------------------------------------------|----------------------------------------------------------------------------------------------|----------------------------------------------------------------------------------------|
|                                                          | A<br>(Protons associated with aromatic ring) | B<br>(Protons associated with vinyl group) | C<br>(Protons associated with allyl and benzyl group)  | D<br>(Protons associated with -CH <sub>2</sub> - and -CH <sub>3</sub> groups of alkyl chain) |                                                                                        |
| Oleic Acid                                               | 0                                            | 2                                          | 4<br>(allylic protons; no benzylic protons)            | 27                                                                                           | Linear chain aliphatic structure with backbone with an unsaturation (C=C) in the chain |
| Deoxygenated product under preferred reaction conditions | 7.51                                         | Negligible                                 | 8.35<br>(benzylic protons, negligible allylic protons) | 3                                                                                            | Substantially aromatic compounds with short-chain alkyl substituents                   |

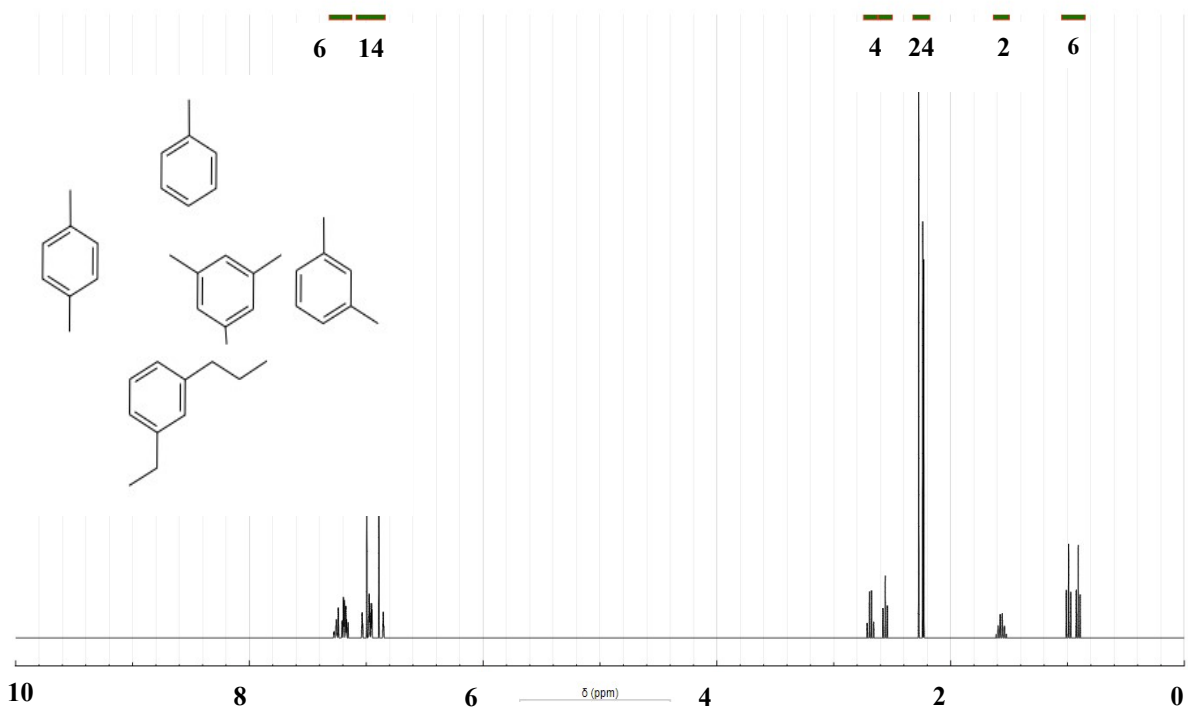

**Figure S7** Simulated  $^1\text{H-NMR}$  spectra of alkyl aromatics; Integral area are as follows: (A) = 20, (B) = 28 & (C) = 8.

| <b>Test Parameter</b>           | <b>Method Reference</b> | <b>Percentage in CDO</b> | <b>Percentage in UCO</b> |
|---------------------------------|-------------------------|--------------------------|--------------------------|
| Free Fatty Acid (as Oleic Acid) | AOCS Ca 5a-40           | 12.87%                   | 14.0%                    |
| Unsaponifiable Matter           | AOCS Ca 6a-40           | 1.26%                    | 1.8%                     |
| Moisture and Volatility         | AOCS Ca 2b-38           | 0.46%                    | 0.8%                     |
| Palmitic Acid (C16:0)           | AOAC 963.22 & 991.39    | 14.30%                   | 29.0%                    |
| Palmitoleic Acid (C16:1)        | AOAC 963.22 & 991.39    | 0.10%                    | 0.8%                     |
| Heptadecanoic Acid (C17:0)      | AOAC 963.22 & 991.39    | 0.10%                    | 0.2%                     |
| Stearic Acid (C18:0)            | AOAC 963.22 & 991.39    | 1.80%                    | 4.0%                     |
| Oleic Acid (C18:1)              | AOAC 963.22 & 991.39    | 24.40%                   | 35.0%                    |
| Vaccenoic Acid (C18:1w9)        | AOAC 963.22 & 991.39    | 0.70%                    | 1.5%                     |
| Linoleic Acid (C18:2)           | AOAC 963.22 & 991.39    | 55.80%                   | 12.0%                    |
| Linolenic Acid (C18:3w3)        | AOAC 963.22 & 991.39    | 1.30%                    | 0.6%                     |
| Arachidic Acid (C20:0)          | AOAC 963.22 & 991.39    | 0.40%                    | 0.5%                     |
| Behenic Acid (C22:0)            | AOAC 963.22 & 991.39    | 0.20%                    | 0.3%                     |
| Eicosenoic Acid (C20:1)         | AOAC 963.22 & 991.39    | 0.30%                    | 0.7%                     |
| Eicosadienoic Acid (C20:2)      | AOAC 963.22 & 991.39    | 0.10%                    | 0.2%                     |
| Lignoceric Acid (C24:0)         | AOAC 963.22 & 991.39    | 0.50%                    | 0.8%                     |

**Figure S8** Total Fatty Acid (TFA) Composition of Corn Distiller's Oil (CDO) and Used Cooking Oil (UCO)

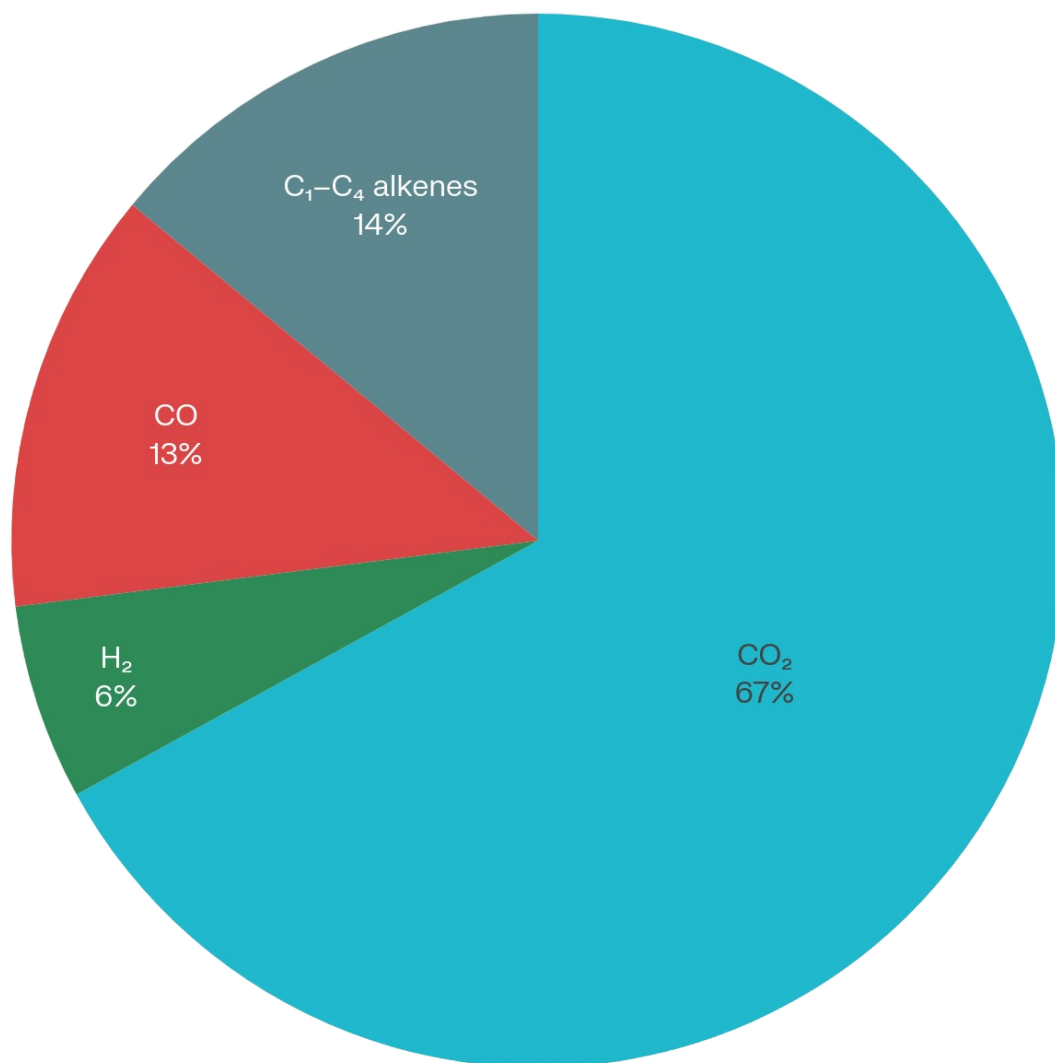

**Figure S9** Distribution of Gaseous Products for catalytic conversion of fatty acid-derived feedstocks over 7.5 wt% MoO<sub>x</sub>/HZSM-5.

---

Sample CDO

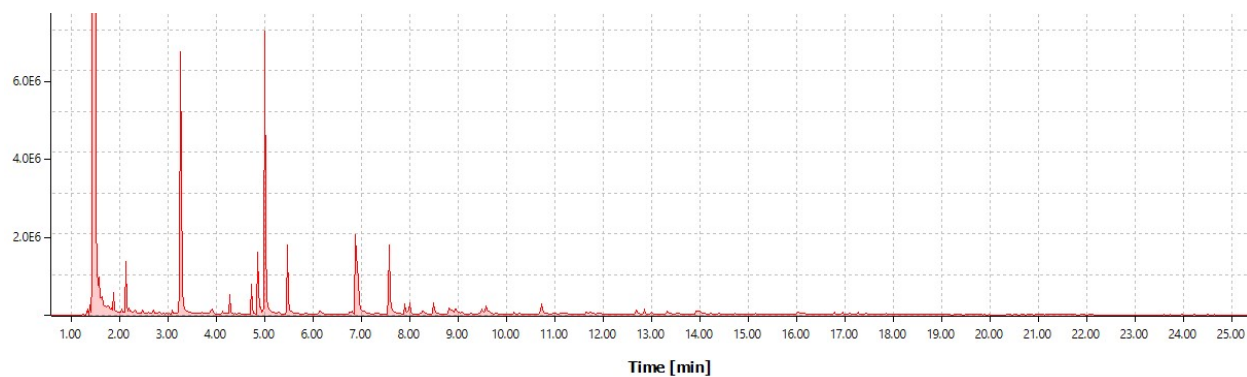

| RT (min) | CAS#        | Name                                          | wt %  |
|----------|-------------|-----------------------------------------------|-------|
| 1.8949   | 000096-37-7 | Cyclopentane, methyl-                         | 0.67  |
| 2.1425   | 000071-43-2 | Benzene                                       | 8.45  |
| 3.2568   | 000108-88-3 | Toluene                                       | 19.19 |
| 4.8662   | 000100-41-4 | Ethylbenzene                                  | 4.14  |
| 5.0148   | 000108-38-3 | m-Xylene                                      | 18.12 |
|          | 000106-42-3 | p-Xylene                                      |       |
| 5.4852   | 000095-47-6 | o-Xylene                                      | 4.62  |
| 6.1538   | 000098-82-8 | Isopropylbenzene                              | 0.28  |
| 6.7728   | 000103-65-1 | n-Propylbenzene                               | 0.29  |
| 6.8966   | 000620-14-4 | m-Ethyltoluene                                | 7.86  |
|          | 000622-96-8 | p-Ethyltoluene                                |       |
| 7.5652   | 000095-63-6 | Benzene, 1,2,4-trimethyl-                     | 4.27  |
| 7.9118   | 062016-34-6 | Octane, 2,3,7-trimethyl-                      | 0.80  |
| 7.9861   | 017302-28-2 | Nonane, 2,6-dimethyl-                         | 1.02  |
| 8.2585   | 000099-87-6 | p-Cymene                                      | 0.58  |
| 8.4813   | 000496-11-7 | Indane                                        | 1.22  |
| 8.828    | 001074-55-1 | Benzene, 1-methyl-4-propyl-                   | 1.03  |
| 8.9518   | 000135-01-3 | Benzene, 1,2-diethyl-                         | 1.22  |
| 9.4965   | 000767-58-8 | Indan, 1-methyl-                              | 0.59  |
| 9.5956   | 002870-04-4 | Benzene, 2-ethyl-1,3-dimethyl-                | 1.21  |
| 10.2641  | 000095-93-2 | Benzene, 1,2,4,5-tetramethyl-                 | 0.29  |
| 10.7098  | 000874-35-1 | 1H-Indene, 2,3-dihydro-5-methyl-              | 1.26  |
| 11.205   | 000119-64-2 | Naphthalene, 1,2,3,4-tetrahydro-              | 0.61  |
| 11.6507  | 056253-64-6 | Benzene, (2-methyl-1-butenyl)-                | 0.72  |
| 11.9231  | 016002-93-0 | trans-1-Phenyl-1-pentene                      | 0.40  |
| 12.6907  | 001559-81-5 | Naphthalene, 1,2,3,4-tetrahydro-1-methyl-     | 0.48  |
| 12.8392  | 017301-30-3 | Undecane, 3,8-dimethyl-                       | 0.45  |
| 12.9878  | 017312-65-1 | Undecane, 3,3-dimethyl-                       | 0.29  |
| 13.3345  | 006682-71-9 | 1H-Indene, 2,3-dihydro-4,7-dimethyl-          | 0.67  |
| 13.9535  | 000091-57-6 | Naphthalene, 2-methyl-                        | 1.01  |
| 14.3992  | 007524-63-2 | Naphthalene, 1,2,3,4-tetrahydro-2,6-dimethyl- | 0.31  |

|         |             |                            |      |
|---------|-------------|----------------------------|------|
| 16.0334 | 000581-42-0 | Naphthalene, 2,6-dimethyl- | 0.90 |
| 16.7762 | 003891-99-4 | 2,6,10-Trimethyltridecane  | 0.25 |
| 16.9495 | 025117-32-2 | Tetradecane, 5-methyl-     | 0.25 |

Note: Chemicals in green background were quantified with standards while others were semi-quantified based on reference m/p-xylene.

**Figure S10** A representative GC-MS chromatogram under maximized conditions with CDO as feedstock.

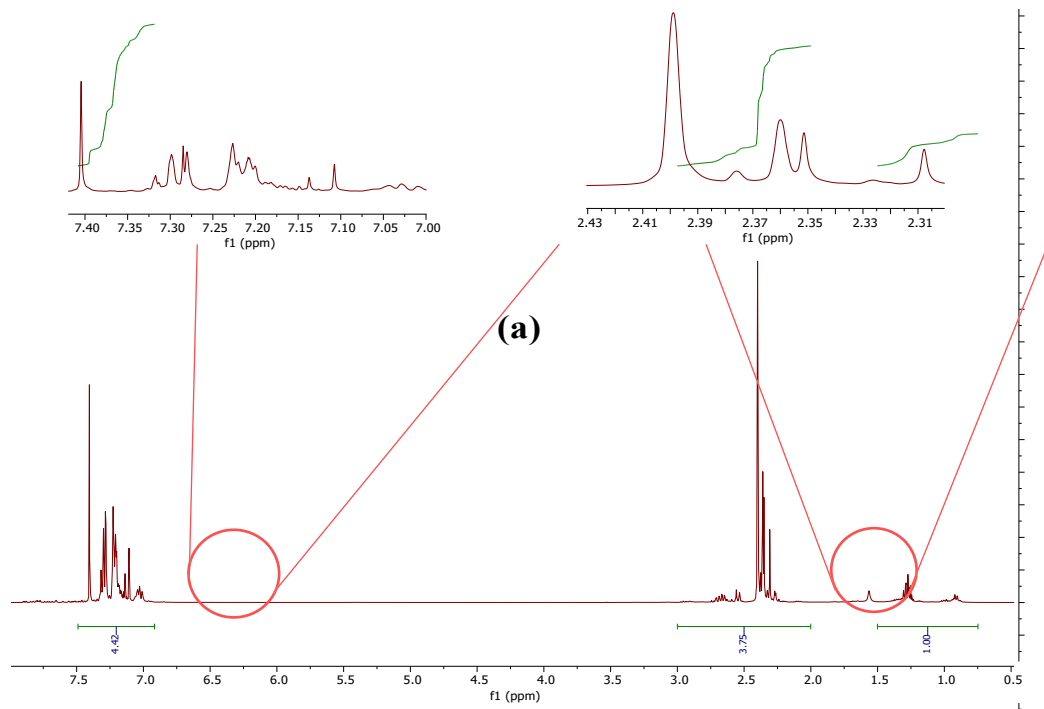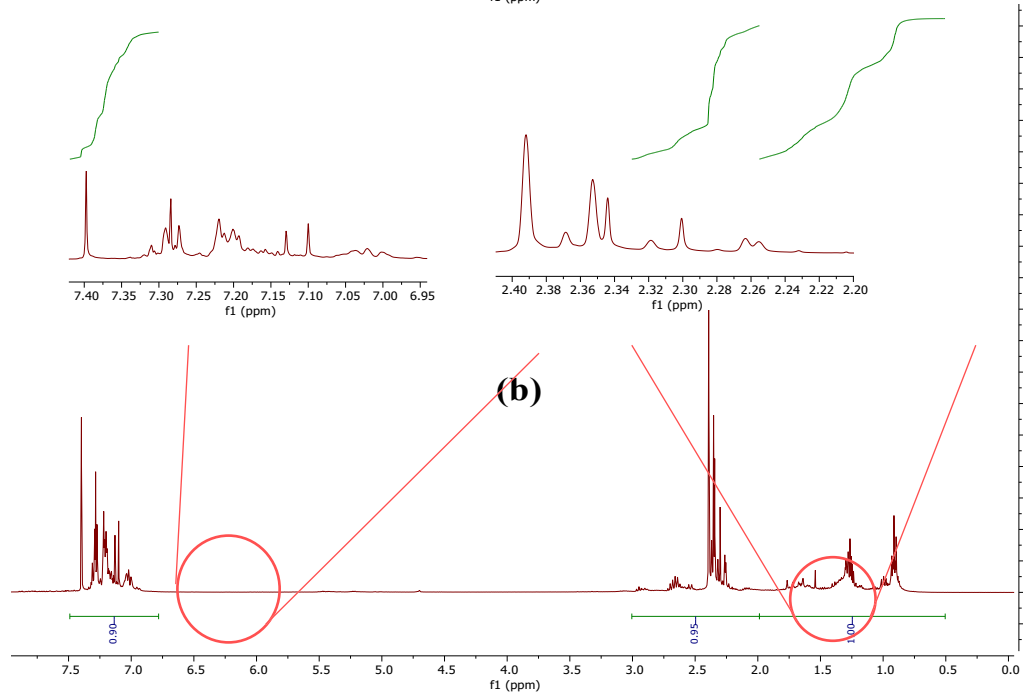

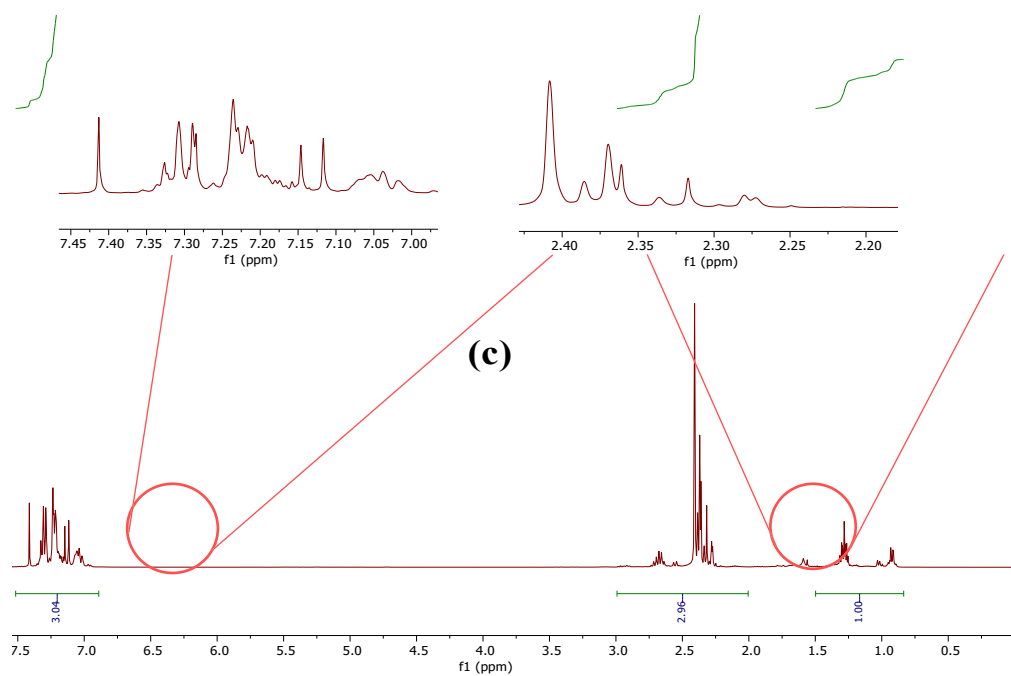

**Figure S11** Product distribution for catalytic conversion of oleic acid with (a) Linoleic acid, (b) Used Cooking oil and (c) Corn Distiller's Oil under maximized operating conditions.

---

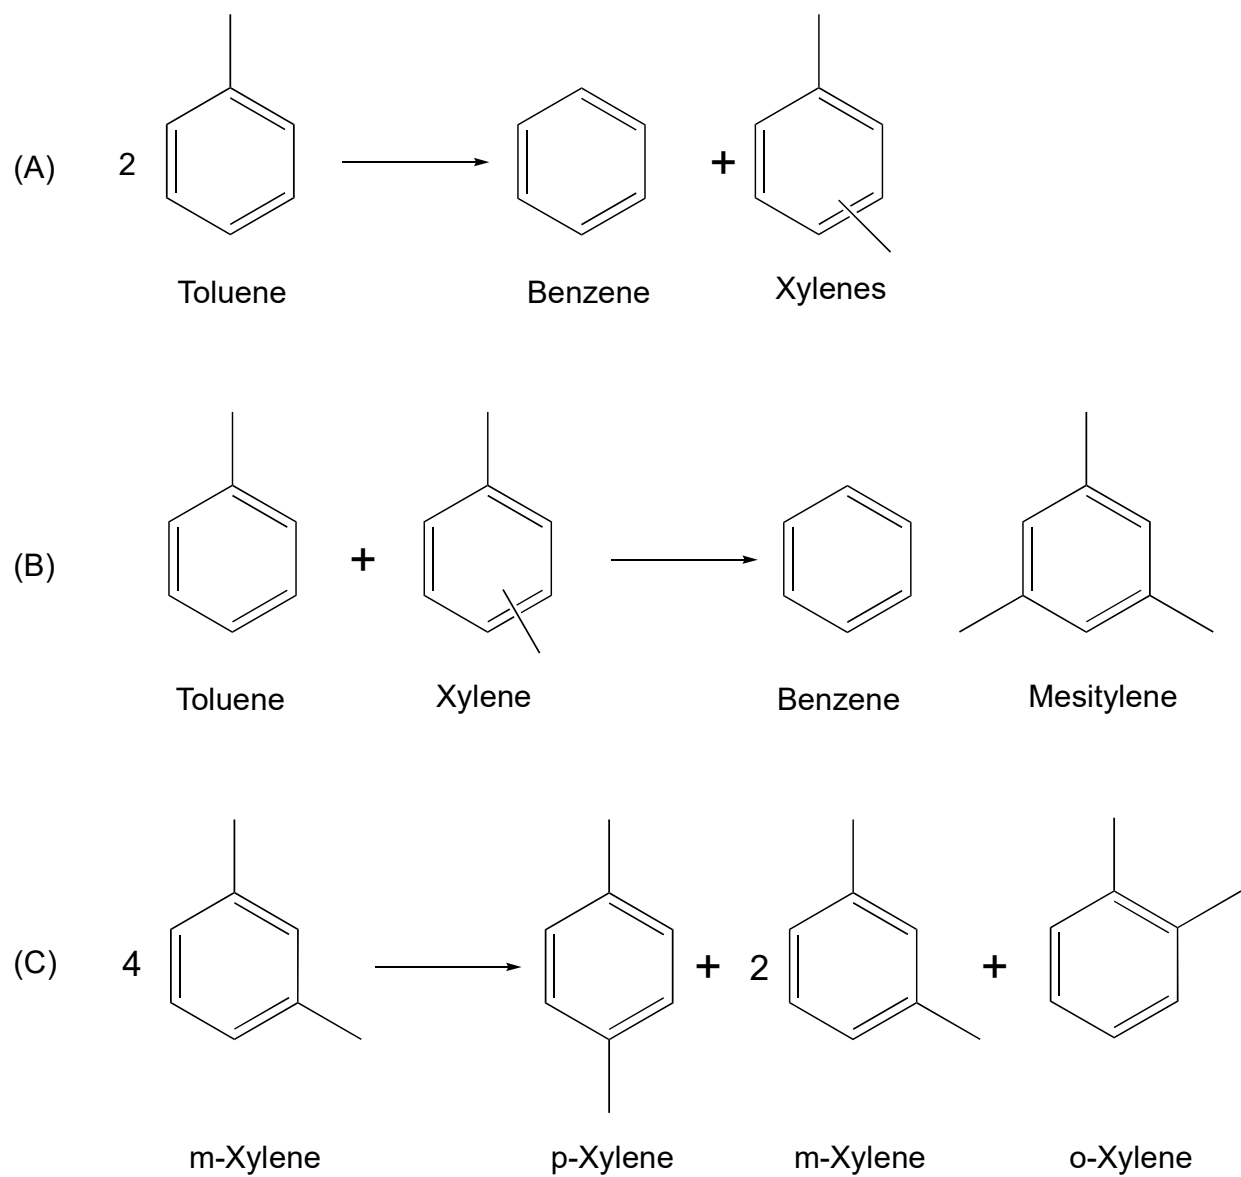

**Figure S12** Proposed reaction pathway for formation of benzene and xylene isomers.

---

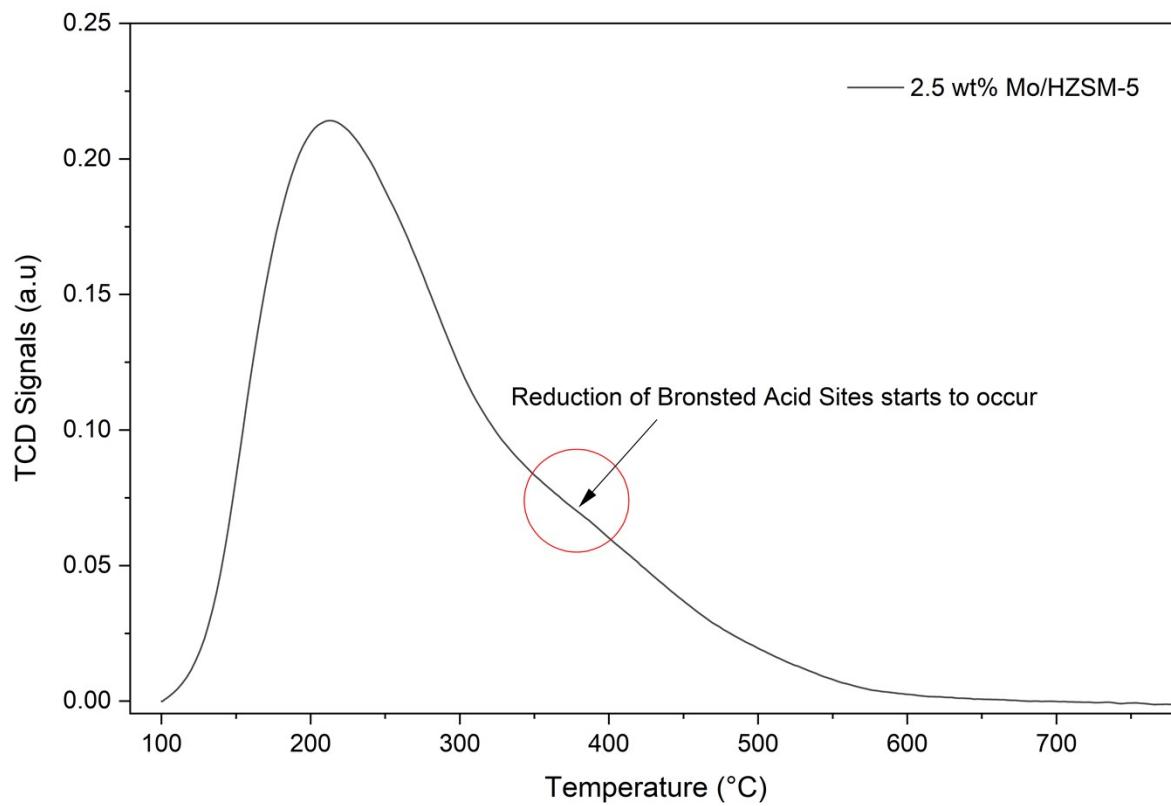

**Figure S13 NH<sub>3</sub> TPD of 2.5 wt% Mo/HZSM-5.**

---

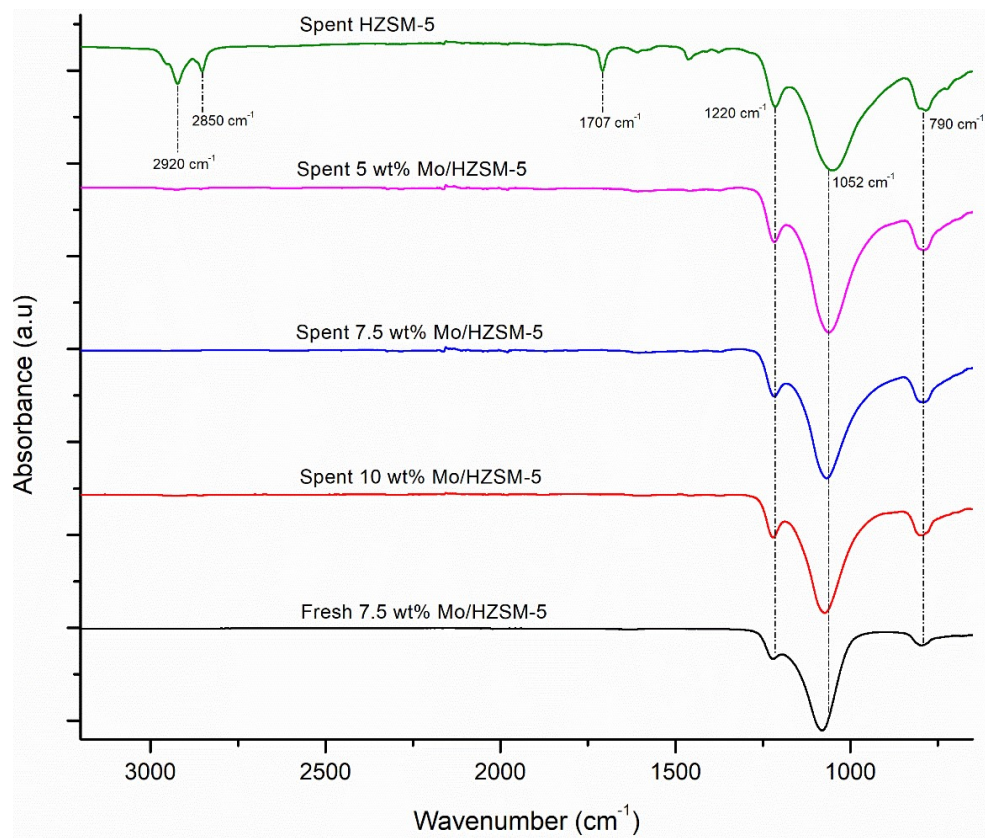

**Figure S14** FTIR analysis of the fresh and spent catalysts.

---

| Parameter / Analyte | MRL        | Units        | 7.5% Mo/HZSM-5 | 10% Mo/HZSM-5 | Ref. Method            |
|---------------------|------------|--------------|----------------|---------------|------------------------|
| Barium              | 0.1        | mg/kg        | < 0.10         | < 0.10        | EPA 3050B/6010C        |
| Calcium             | 3          | mg/kg        | 21             | 130           | EPA 3050B/6010C        |
| Cobalt              | 0.1        | mg/kg        | 0.18           | 0.88          | EPA 3050B/6010C        |
| Copper              | 0.1        | mg/kg        | 1.3            | 1.7           | EPA 3050B/6010C        |
| Iron                | 1          | mg/kg        | 140            | 140           | EPA 3050B/6010C        |
| <b>Molybdenum</b>   | <b>0.5</b> | <b>mg/kg</b> | <b>74800</b>   | <b>98700</b>  | <b>EPA 3050B/6010C</b> |
| Nickel              | 1          | mg/kg        | 32             | 24            | EPA 3050B/6010C        |
| Potassium           | 5          | mg/kg        | 17             | 80            | EPA 3050B/6010C        |
| Sodium              | 5          | mg/kg        | 120            | 110           | EPA 3050B/6010C        |
| Strontium           | 0.1        | mg/kg        | 0.24           | 0.32          | EPA 3050B/6010C        |
| Vanadium            | 0.5        | mg/kg        | < 0.51         | < 0.50        | EPA 3050B/6010C        |

**Figure S15** ICP-AES analysis for 7.5 wt% Mo/HZSM-5 and 10 wt% Mo/HZSM-5.
